# Supplementary material
Source: PubMed Central journal article supplement (PMC3031408)
Supplement: blood-2010-03-274506_1.pdf [file blood-2010-03-274506_1.pdf]

**Table S1. Summary of T cell Lymphoma in Id3<sup>-/-</sup> mice**

| Mouse | Sex | Age (w) | Involvement                    | Cell type                                                                                            | T cell marker              | TCRV $\gamma$                  | C-myc | Notch 1 | Other marker                                                      | Other symptom    |
|-------|-----|---------|--------------------------------|------------------------------------------------------------------------------------------------------|----------------------------|--------------------------------|-------|---------|-------------------------------------------------------------------|------------------|
| #6    | F   | 51      | Thy, Liv, Spl, LN              | T ( $\alpha\beta$ - $\gamma\delta$ +)                                                                | CD3+CD4-CD8+               | ND                             | ND    | ND      | CD25-CD34-CD44 <sup>int</sup><br>CD62L <sup>low</sup> CD69-C-kit- | Der, WL, HP, Lis |
| #12   | F   | 50      | Liv, Spl, LN                   | ND                                                                                                   | ND                         | ND                             | ND    | ND      | ND                                                                | Der, WL, HP, Lis |
| #38   | F   | 55      | Spl, LN                        | B (B220+<br>CD19+)<br>T ( $\alpha\beta$ - $\gamma\delta$ -)<br>T ( $\alpha\beta$ - $\gamma\delta$ +) | CD3-CD4-CD8-               | ND                             | -     | -       | CD25-CD34+CD44 <sup>int</sup><br>C-kit-                           | WL, HP, Lis      |
| #39   | F   | 66      | Thy, Liv, Spl, LN, SG          | T ( $\alpha\beta$ - $\gamma\delta$ +)                                                                | CD3+CD4+<br>and CD3+CD8+   | ND                             | +     | -       | CD25-CD34-CD44 <sup>int</sup><br>C-kit-                           | WL, HP, Lis      |
| #43   | F   | 63      | Thy, Liv, Spl, LN, SG, Lun, BM | T ( $\alpha\beta$ - $\gamma\delta$ +)                                                                | CD3+CD4+CD8-               | V $\gamma$ 2-<br>V $\gamma$ 3+ | +     | -       | CD25-CD34-CD44 <sup>int</sup><br>C-kit-                           | WL, HP, Lis      |
| #44   | F   | 63      | Thy, Liv, Spl, LN, SG, Lun, BM | T ( $\alpha\beta$ - $\gamma\delta$ +)                                                                | CD3+CD4-CD8+               | V $\gamma$ 2-<br>V $\gamma$ 3+ | +     | -       | CD25- CD34-CD44 <sup>int</sup><br>C-kit-                          | Der, WL, Lis     |
| #46   | F   | 61      | Liv, Spl, BM                   | B (B220+<br>CD19+)<br>T (ND)                                                                         | CD3-CD4-CD8-               | ND                             | -     | -       | CD25-CD34-CD44 <sup>hi</sup><br>C-kit-                            | Der, WL, HP, Lis |
| #47   | F   | 50      | Liv, Spl, LN                   | T (ND)                                                                                               | CD3+CD4+CD8-               | ND                             | -     | -       | CD25-CD34-CD44 <sup>hi</sup><br>C-kit-                            | Der, WL, HP, Lis |
| #48   | F   | 50      | Liv, Spl, LN                   | T (ND)                                                                                               | CD3+CD4+CD8+               | ND                             | -     | -       | CD25-CD34-CD44 <sup>int</sup><br>C-kit-                           | Der, WL, HP, Lis |
| #49   | F   | 47      | Liv, Spl, LN                   | T (ND)                                                                                               | CD3+CD4+CD8-               | ND                             | -     | -       | CD25-CD34-CD44 <sup>hi</sup><br>C-kit-                            | Der, WL, HP, Lis |
| #50   | M   | 47      | Thy, Spl                       | T (ND)                                                                                               | CD3+CD4-CD8+               | ND                             | -     | -       | CD25-CD34-CD44 <sup>hi</sup><br>C-kit-                            | Der, WL, HP, Lis |
| #53   | M   | 54      | Thy, Spl, LN, Lun, SG          | B (B220+<br>CD19+)<br>T ( $\alpha\beta$ - $\gamma\delta$ -)<br>T ( $\alpha\beta$ - $\gamma\delta$ +) | CD3-CD4-CD8-               | ND                             | +     | -       | CD25-CD34-C-kit-                                                  | WL, HP, Lis, SOB |
| #55   | F   | 59      | Thy, Liv, Spl, Lun, BM         | T ( $\alpha\beta$ - $\gamma\delta$ -)<br>T ( $\alpha\beta$ - $\gamma\delta$ +)                       | CD3+CD4-CD8+               | ND                             | -     | -       | CD25-                                                             | WL, HP, Lis, SOB |
| #56   | F   | 61      | Thy, Liv, Spl, LN, Lun         | ND                                                                                                   | ND                         | ND                             | ND    | ND      | ND                                                                | WL, HP, Lis, SOB |
| #61   | M   | 74      | Thy, Liv, Spl, LN, Lun, SG     | T ( $\alpha\beta$ (ND)<br>$\gamma\delta$ -)                                                          | CD3+CD4+CD8+               | ND                             | ND    | ND      | CD25-                                                             | WL, HP, Lis, SOB |
| #63   | M   | 72      | Thy, Liv, Spl, LN              | T ( $\alpha\beta$ (ND)<br>$\gamma\delta$ +)                                                          | CD3+CD4+<br>and CD3+CD8+   | ND                             | ND    | ND      | CD25-                                                             | WL, HP, Lis      |
| #64   | F   | 45      | Liv, Spl, LN                   | T (ND)                                                                                               | CD4-CD8-                   | ND                             | ND    | ND      | CD25-CD44 <sup>int</sup> CD62L <sup>low</sup><br>CD69+            | Der, WL, HP, Lis |
| #69   | M   | 88      | Spl                            | ND                                                                                                   | ND                         | ND                             | ND    | ND      | ND                                                                | ND               |
| #71   | F   | 79      | N/A                            | ND                                                                                                   | ND                         | ND                             | ND    | ND      | ND                                                                | Der              |
| #72   | F   | 74      | Liv, Spl, LN                   | ND                                                                                                   | ND                         | ND                             | ND    | ND      | ND                                                                | WL               |
| #76   | F   | 69      | Liv, Spl, LN, SG               | T ( $\alpha\beta$ - $\gamma\delta$ +)                                                                | CD4+, CD8+ and<br>CD4-CD8- | ND                             | ND    | ND      | ND                                                                | WL, HP, Lis      |
| #82   | F   | 86      | Thy, Liv, Spl, LN, SG          | T ( $\alpha\beta$ (ND)<br>$\gamma\delta$ -)                                                          | CD4-CD8-                   | ND                             | ND    | ND      | ND                                                                | WL, HP, Lis, SOB |

|           |   |    |                                       |                                             |               |    |    |    |    |                  |
|-----------|---|----|---------------------------------------|---------------------------------------------|---------------|----|----|----|----|------------------|
| #83       | F | 87 | Liv, Spl                              | T ( $\alpha\beta$ (ND)<br>$\gamma\delta+$ ) | CD4+ and CD8+ | ND | ND | ND | ND | Der              |
| #85       | F | 93 | LN                                    | ND                                          | ND            | ND | ND | ND | ND | WL, HP, Lis      |
| #86       | M | 56 | Spl, LN                               | T ( $\alpha\beta$ - $\gamma\delta+$ )       | CD3+CD4+      | ND | -  | ND | ND | Der              |
| #87       | M | 65 | Spl                                   | T ( $\alpha\beta$ - $\gamma\delta+$ )       | CD3+CD4+      | ND | ND | ND | ND | Der              |
| #88       | F | 57 | Thy, Liv, Spl,<br>LN, Lun             | ND                                          | ND            | ND | ND | ND | ND | Der              |
| #89       | F | 66 | Thy, Spl, LN                          | T ( $\alpha\beta$ - $\gamma\delta+$ )       | CD8+          | ND | ND | ND | ND | Der              |
| MS0605732 | F | 33 | Liv, Spl, LN,<br>Lun                  | ND                                          | ND            | ND | ND | ND | ND | Der              |
| MS0701895 | M | 51 | Liv, Spl, LN,<br>Lun, SG              | ND                                          | ND            | ND | ND | ND | ND | ND               |
| MS0702494 | F | 38 | Thy                                   | ND                                          | ND            | ND | ND | ND | ND | ND               |
| MS0703466 | M | 54 | Liv, Spl, LN                          | ND                                          | ND            | ND | ND | ND | ND | ND               |
| MS0703517 | M | 36 | Liv, Spl, LN,<br>Kid, BM              | ND                                          | ND            | ND | ND | ND | ND | ND               |
| MS0703971 | F | 36 | Liv, Spl, LN,<br>Kid, AG              | ND                                          | ND            | ND | ND | ND | ND | WL, HP, Lis      |
| MS0704530 | F | 40 | Liv, Spl, LN                          | ND                                          | ND            | ND | ND | ND | ND | Der, WL          |
| MS0707748 | M | 79 | Thy, Liv, Spl,<br>LN, Kid, Lun        | ND                                          | ND            | ND | ND | ND | ND | WL, HP, Lis, SOB |
| MS0706129 | F | 55 | Spl, LN, Kid                          | ND                                          | ND            | ND | ND | ND | ND | Der              |
| MS0706809 | M | 63 | Thy, Liv, Spl,<br>LN, Kid, Lun,<br>SG | ND                                          | ND            | ND | ND | ND | ND | ND               |

Abbreviations: Spl: spleen; Thy: thymus; LN: lymph nodes; Liv: liver; BM: bone marrow; SG: salivary gland; Lun: lung; Kid: kidney; AG: adrenal gland; T: T cell;  $\alpha\beta$ :  $\alpha\beta$ TCR;  $\gamma\delta$ :  $\gamma\delta$ TCR; B: B cell; ND: not done; Der: dermatitis; WL: weight loss; HP: hunched posture; Lis: listless; SOB: short of breath

**Figure S1. Adoptive transfer of low dose of  $\gamma\delta$  T-cell lymphoma cells or purified non-lymphoma Id3<sup>-/-</sup>  $\gamma\delta$  T cells to Rag1<sup>-/-</sup> recipients**

Non-lymphoma  $\gamma\delta$  T cells ( $1 \times 10^5$  or  $4 \times 10^6$  per mouse) isolated from the spleen of Id3<sup>-/-</sup> mice (4 weeks old) or  $\gamma\delta$  T-cell lymphoma cells (CD8<sup>+</sup>,  $1 \times 10^5$ ) were injected into Rag1<sup>-/-</sup> mice for 12 weeks. (A) Histopathological analysis of the livers from a representative mouse that received T cell or lymphoma cells (H&E staining, 5 $\times$ ; the insert in each slide was an enlarged area, 100 $\times$ , n = 2-3 mice). (B) Flow cytometric analysis of  $\gamma\delta$  T cell lymphoma isolated from the spleen or other tissues of Rag1<sup>-/-</sup> mice receiving  $\gamma\delta$  T cell lymphoma cells or non-lymphoma Id3<sup>-/-</sup>  $\gamma\delta$  T cells. Data shown are dot plots of indicated markers on the transferred cells in a representative mouse of total of two-three per group. Spl: spleen; Liv: liver; LN: lymph nodes; Lun: lungs; BM: bone marrow.

**a**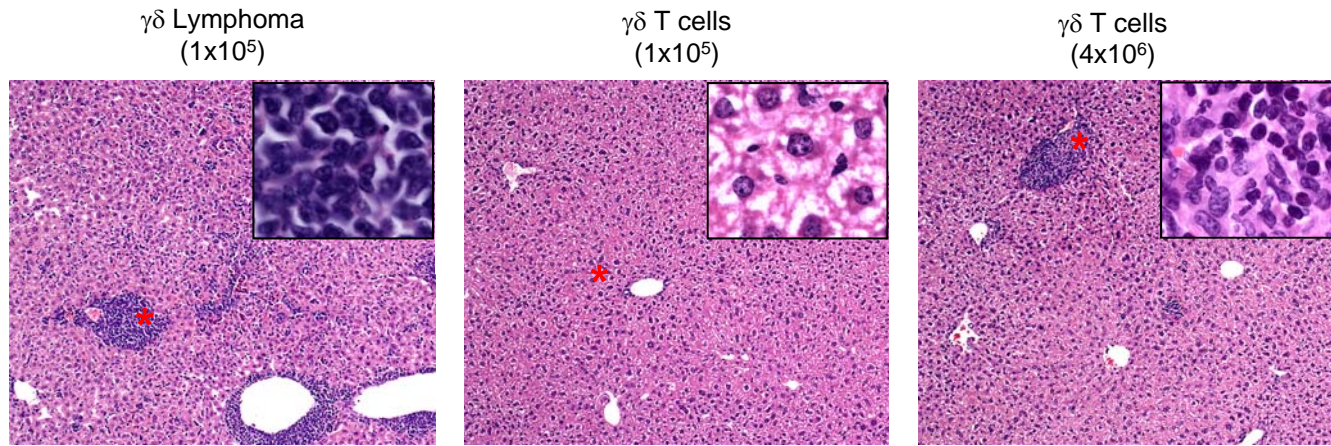**b**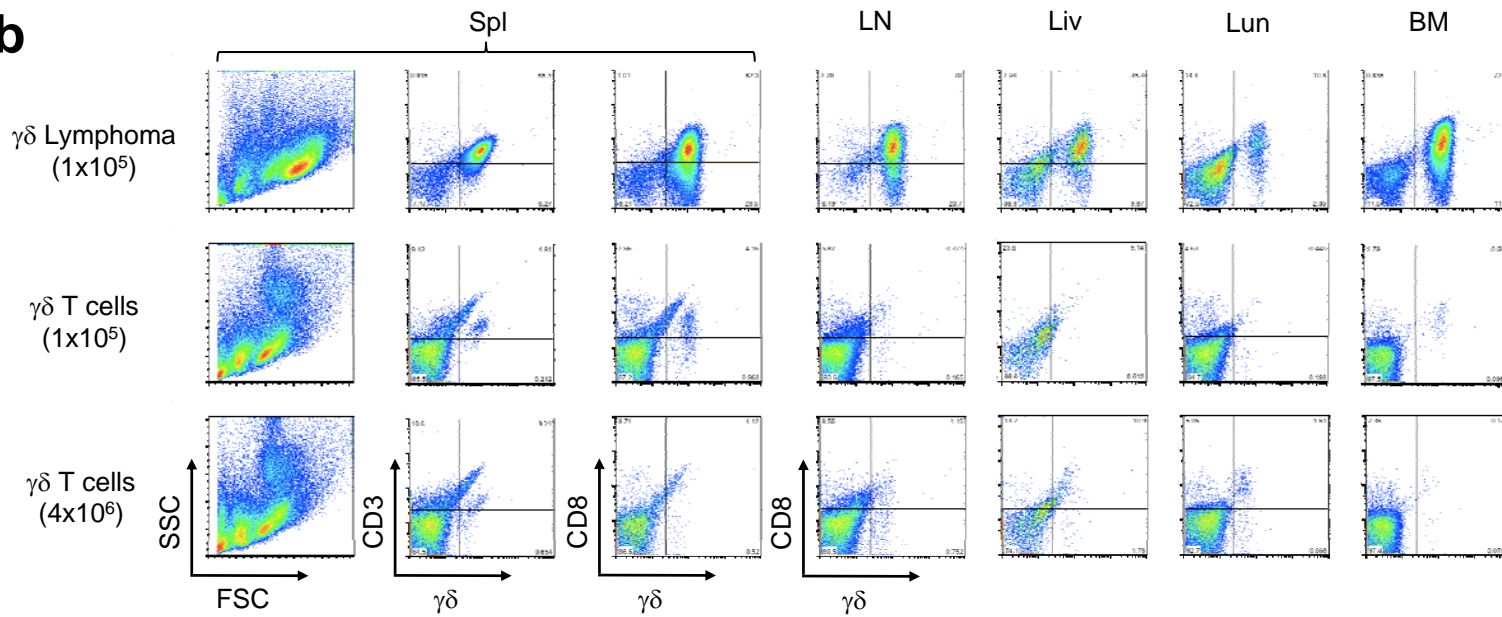**Figure S1**
